# Supplementary material for: Revisiting the Role of Knee External Rotation in Non-Contact ACL Mechanism of Injury
Source: MDPI journal article supplement (doi:10.3390/app13063802), 2023-03-16
Supplement: s1 [file s1]

## Supplement 1

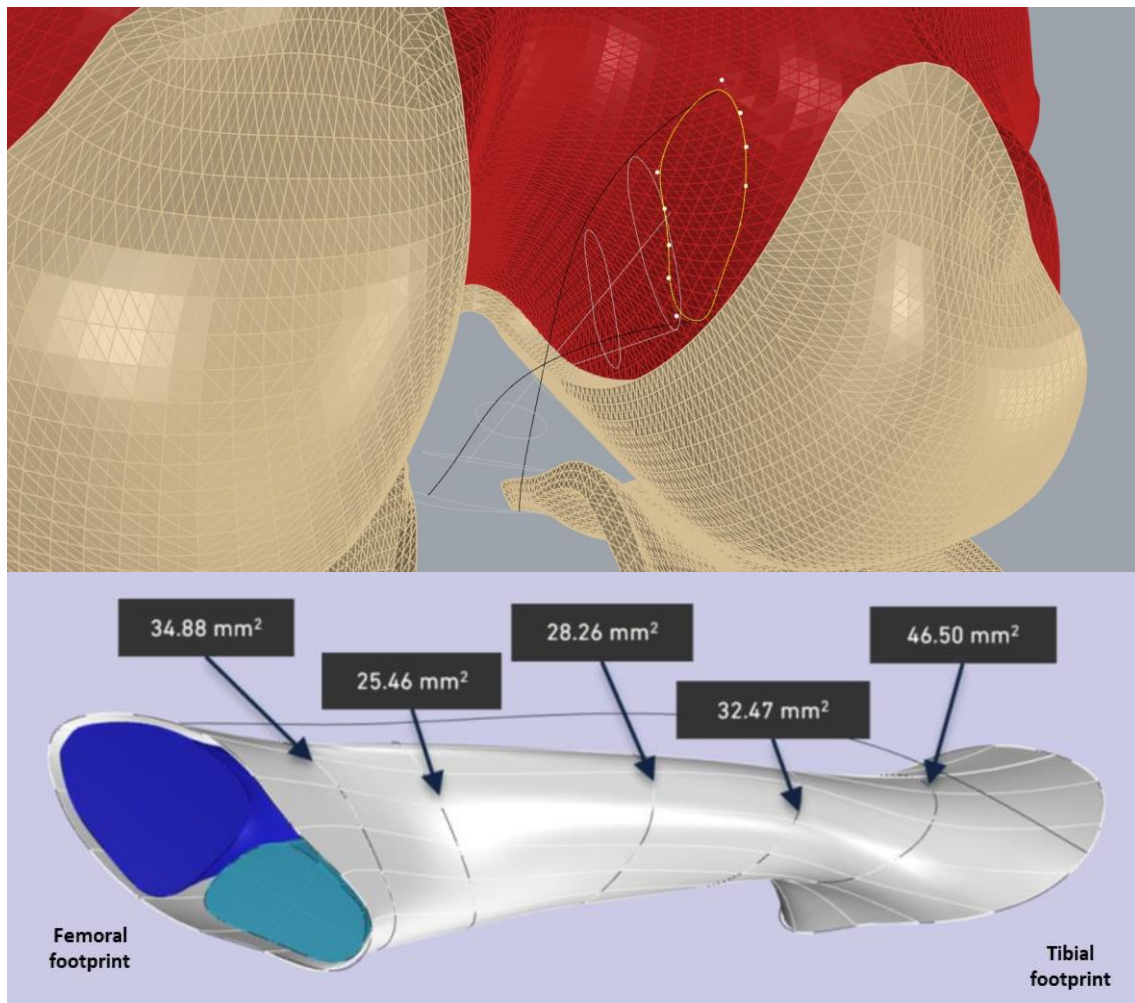

**Figure S1** - FE model showing the five ACL section from its tibial to femoral footprint.

## Supplement 2

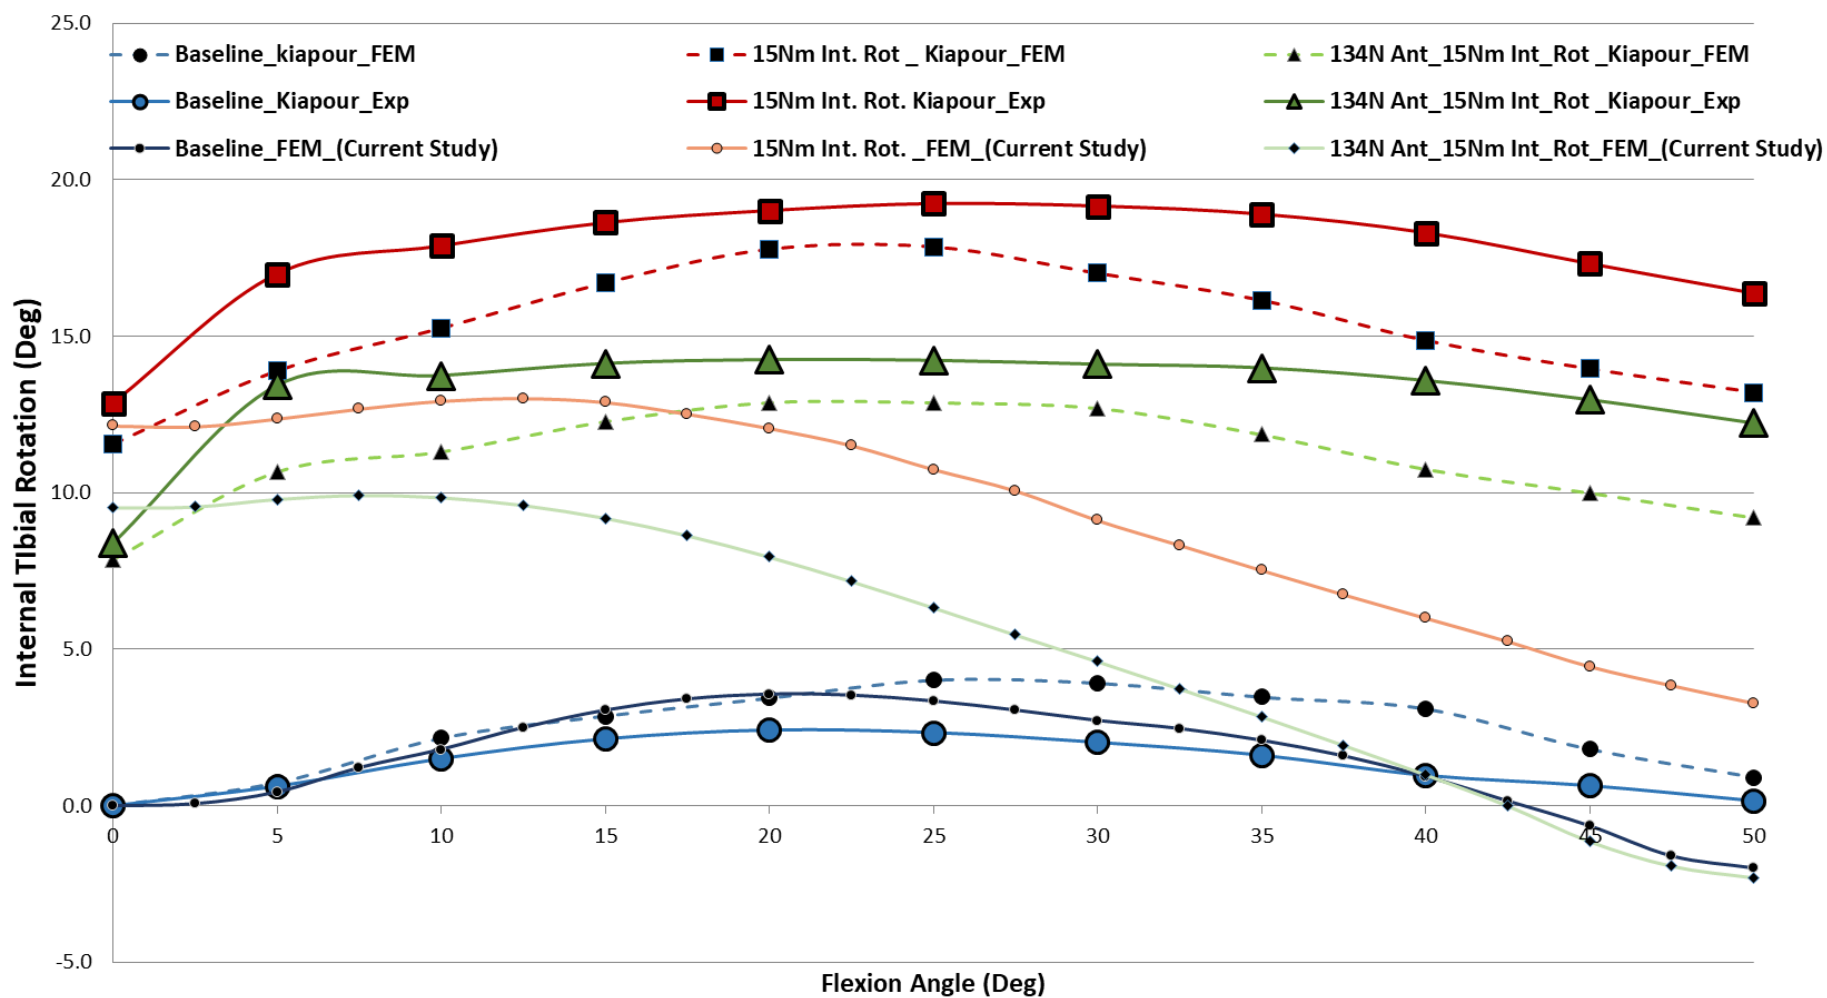

**Figure S2.1** - FE model comparison with literature data for tibiofemoral axial plane kinematics under abduction, internal rotation and sagittal load conditions.

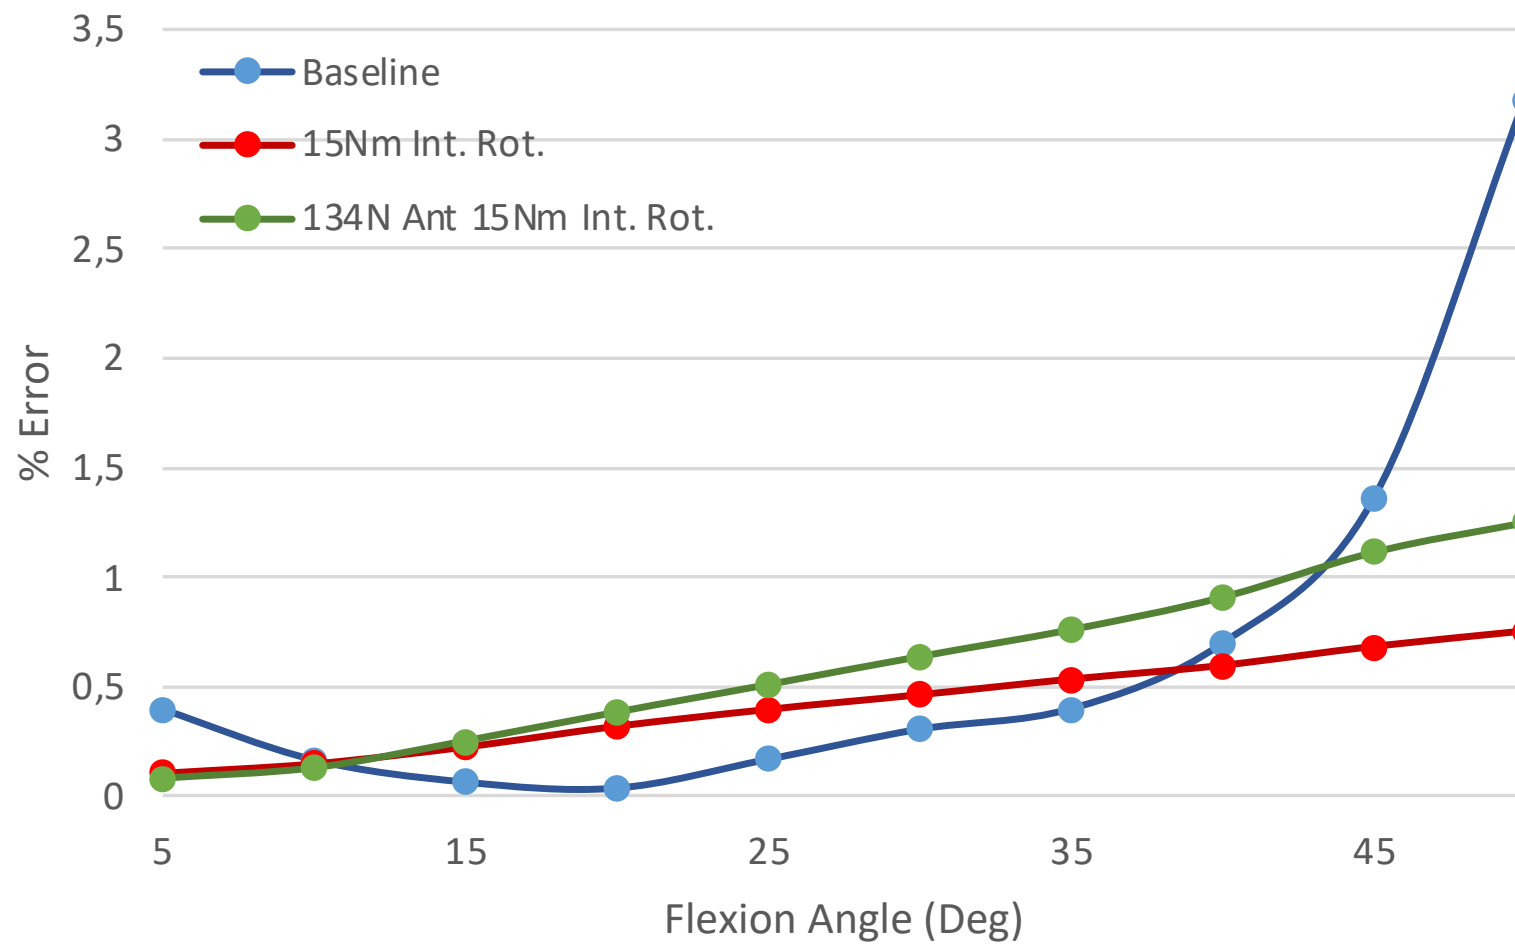

**Figure S2.2** - FE model comparison with Kiapour's et al. FEM data for tibiofemoral axial plane kinematics under abduction, internal rotation and sagittal load conditions.

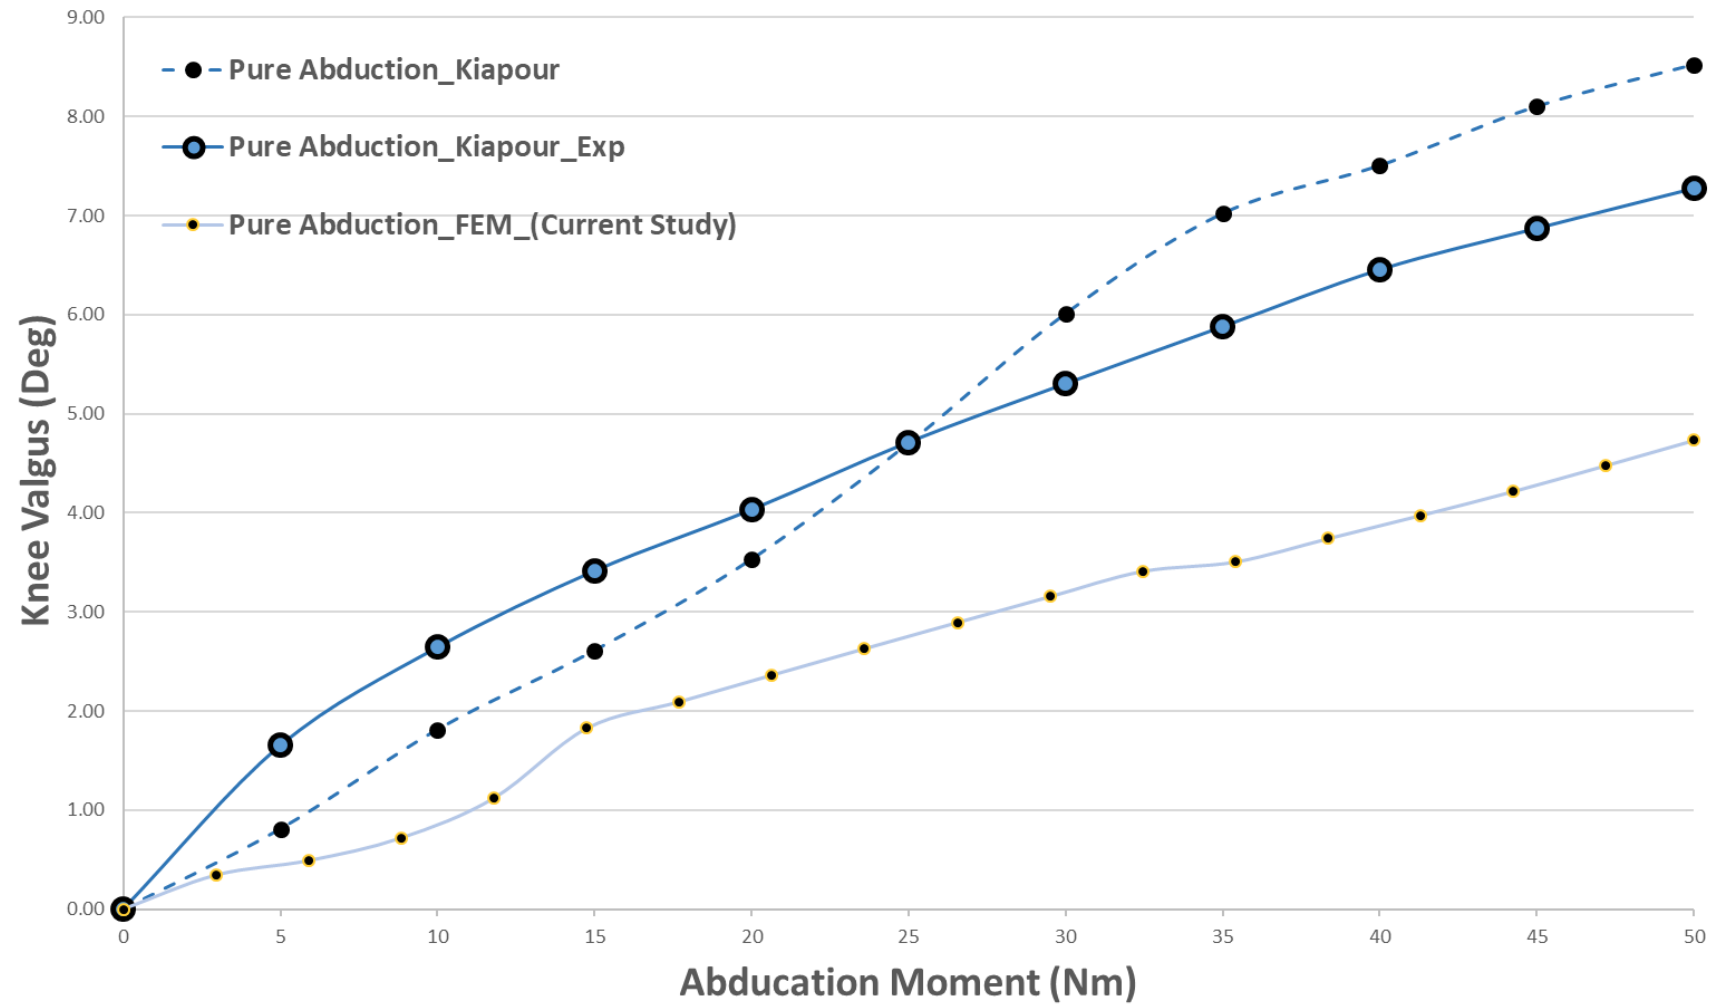

**Figure S2.3** - FE model comparison with literature data for tibiofemoral frontal plane kinematics under 50 Nm abduction moment conditions.

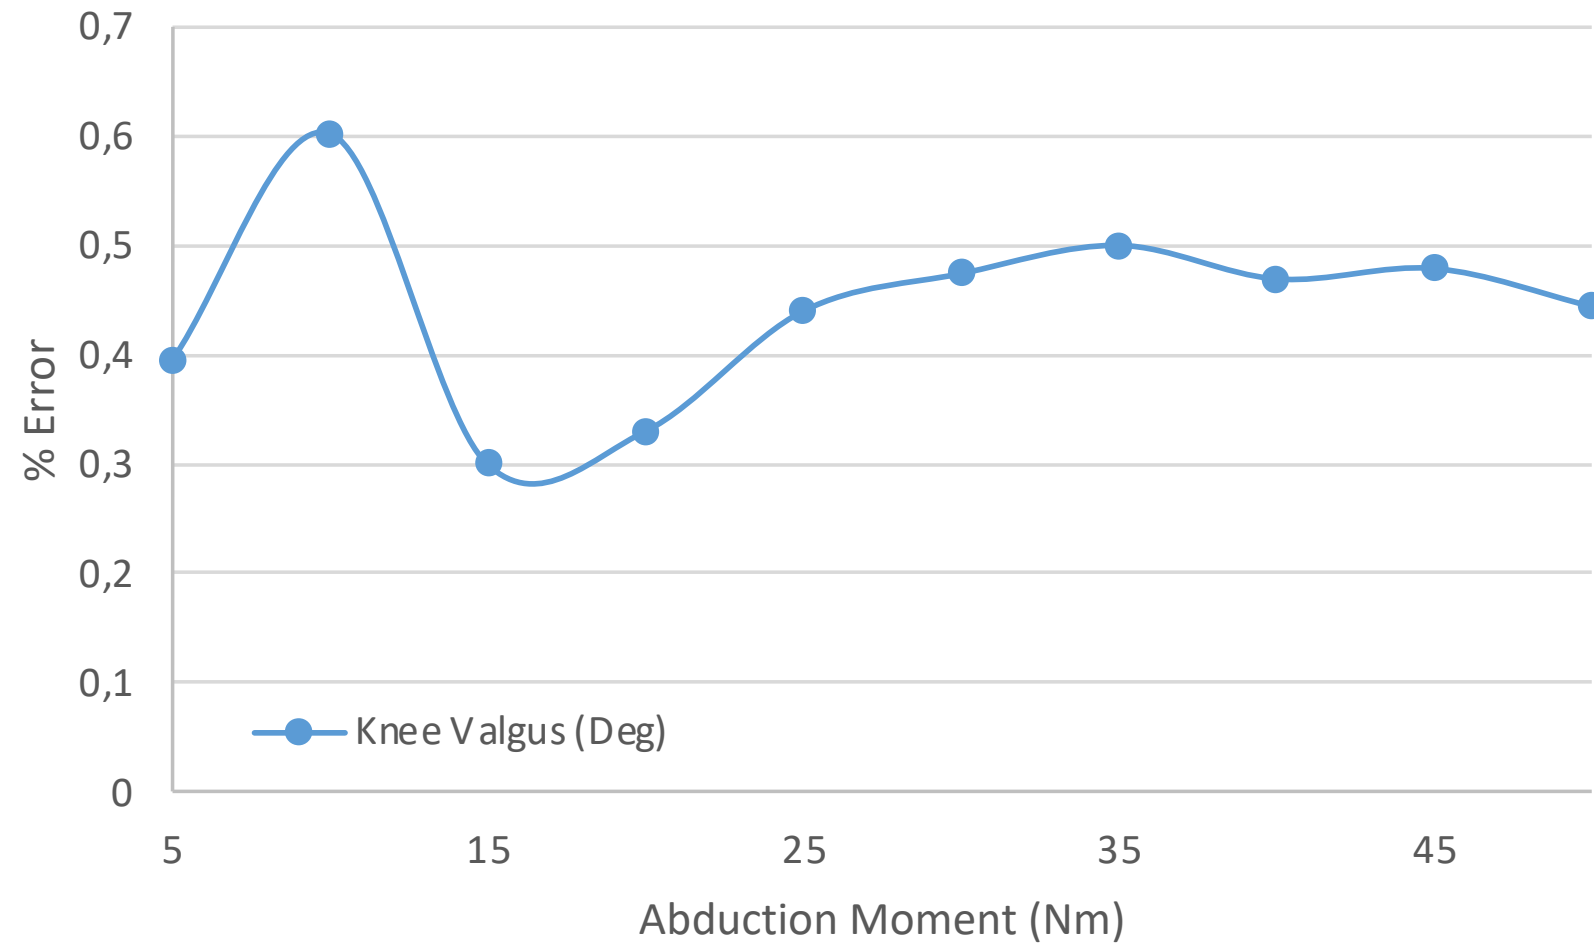

**Figure S2.4** - FE model comparison with Kiapour's et al. FEM data for tibiofemoral frontal plane kinematics under 50 Nm abduction moment conditions.

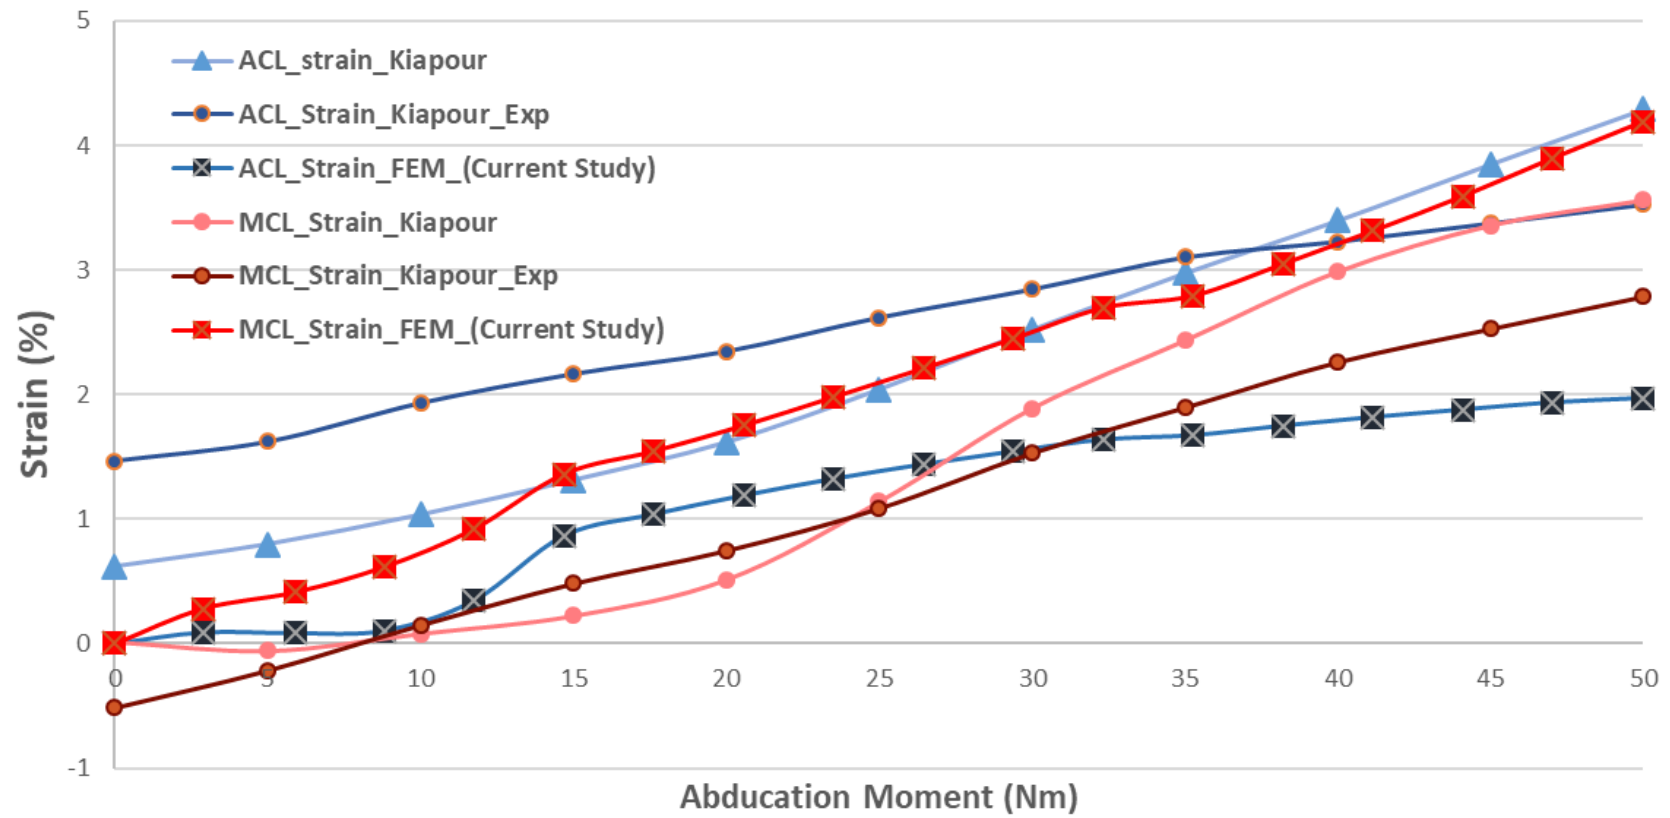

**Figure S2.5** - Comparison of the maximum strain values obtained in the current study, with literature data for the MCL and ACL structures, under 50 Nm abduction moment conditions.

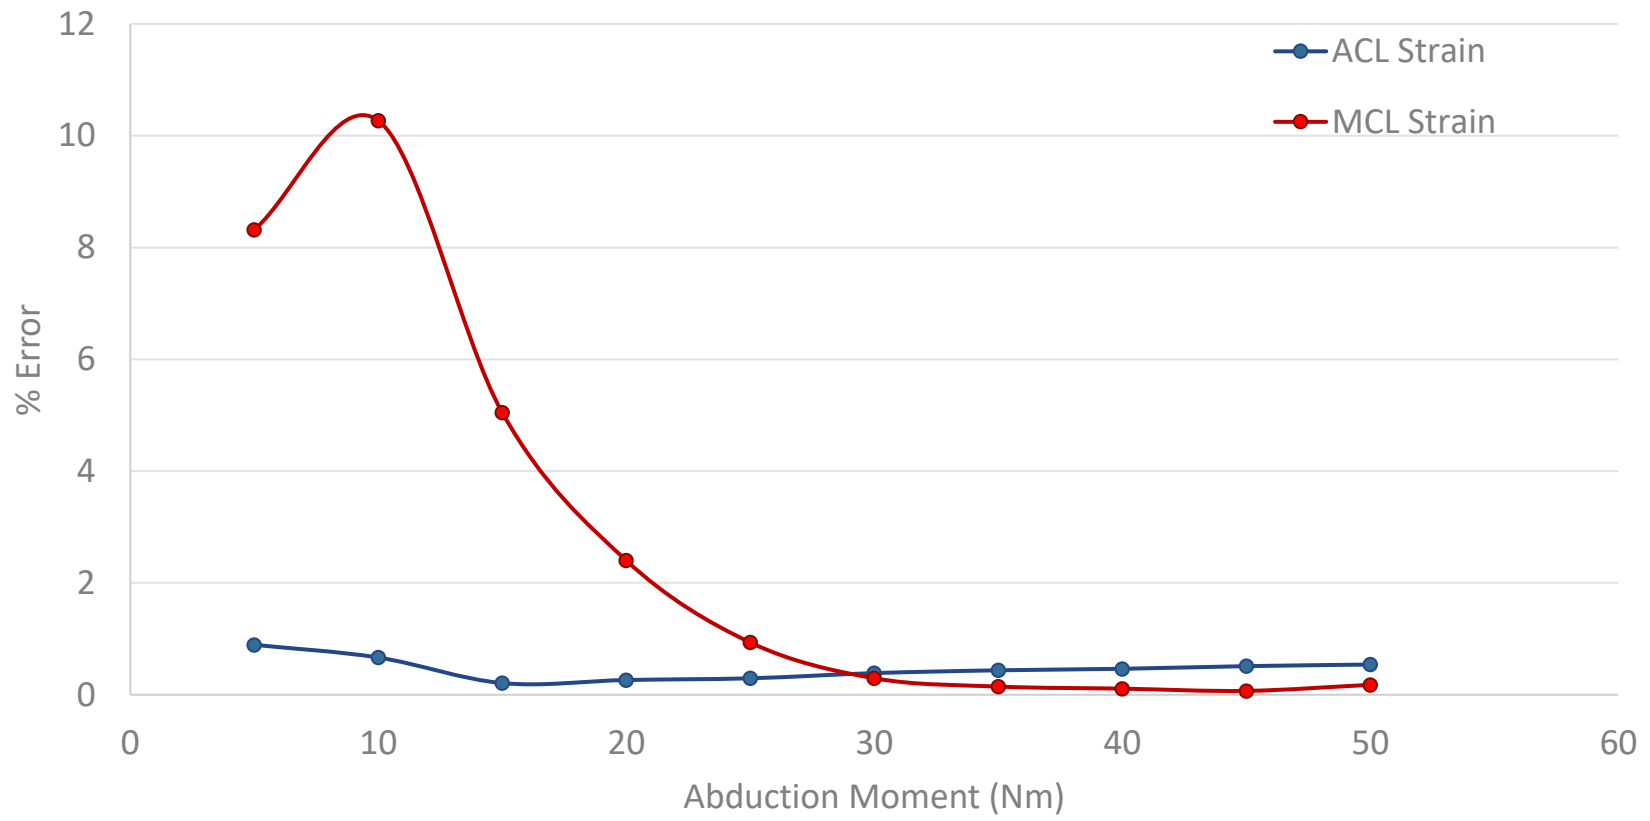

**Figure S2.56** - Comparison of the maximum strain values obtained in the current study, with Kiapour's et al. FEM data for the MCL and ACL structures, under 50 Nm abduction moment conditions.

## Supplement 3

**Table S1** – Output and location of peak stress and strain for the whole ACL ligament and AM/PL bundles.

| #<br>simulation | Whole ligament       |             | AM bundle            |              | PL bundle            |              | Location of Peak<br>Stress / Strain |
|-----------------|----------------------|-------------|----------------------|--------------|----------------------|--------------|-------------------------------------|
|                 | Peak Stress<br>(MPa) | Peak Strain | Peak Stress<br>(MPa) | Peak Strain  | Peak Stress<br>(MPa) | Peak Strain  |                                     |
| #1              | 6.830                | 0.15        | 6.830                | 0.032        | 4.15                 | 0.020        | Mid(AM)/Mid(PL)                     |
| #2              | <b>11.00</b>         | <b>0.25</b> | <b>11.00</b>         | <b>0.048</b> | <b>7.72</b>          | <b>0.034</b> | <b>Mid(AM)/Mid(PL)</b>              |
| #3              | 5.300                | 0.11        | 5.300                | 0.026        | 2.62                 | 0.013        | Mid(AM)/Mid(PL)                     |
| #4              | 10.40                | 0.23        | 10.40                | 0.046        | 7.21                 | 0.032        | Mid(AM)/Mid(PL)                     |
| #5              | 6.780                | 0.14        | 6.780                | 0.032        | 4.14                 | 0.020        | Mid(AM)/Mid(PL)                     |
| #6              | <b>11.00</b>         | <b>0.25</b> | <b>11.00</b>         | <b>0.048</b> | <b>7.68</b>          | <b>0.034</b> | <b>Mid(AM)/Mid(PL)</b>              |
| #7              | 6.000                | 0.12        | 6.000                | 0.029        | 3.40                 | 0.016        | Mid(AM)/Mid(PL)                     |
| #8              | 10.30                | 0.2         | 10.30                | 0.045        | 7.12                 | 0.032        | Mid(AM)/Mid(PL)                     |
| #9              | 5.020                | 0.12        | 5.020                | 0.026        | 2.01                 | 0.009        | Mid(AM)/ Distal(PL)                 |
| #10             | 8.850                | 0.21        | 8.850                | 0.040        | 5.83                 | 0.027        | Mid(AM)/Mid(PL)                     |
| #11             | 4.450                | 0.10        | 4.450                | 0.023        | 1.44                 | 0.007        | Mid(AM)/ Distal(PL)                 |
| #12             | 7.680                | 0.18        | 7.680                | 0.035        | 4.65                 | 0.022        | Mid(AM)/Mid(PL)                     |
| #13             | 4.710                | 0.11        | 4.710                | 0.024        | 1.70                 | 0.008        | Mid(AM)/ Distal(PL)                 |
| #14             | 8.080                | 0.19        | 8.080                | 0.037        | 5.05                 | 0.024        | Mid(AM)/Mid(PL)                     |
| #15             | 4.040                | 0.09        | 4.040                | 0.020        | 1.01                 | 0.006        | Mid(AM)/ Distal(PL)                 |
| #16             | 6.960                | 0.17        | 6.960                | 0.033        | 3.83                 | 0.019        | Mid(AM)/Mid(PL)                     |

**Legend:** Mid – midportion; AM – anteromedial; PL – posterolateral.
